# Supplementary material for: Fermented Yak-Kong using Bifidobacterium animalis derived from Korean infant intestine effectively relieves muscle atrophy in an aging mouse model
Source: Royal Society of Chemistry journal article supplement (doi:10.1039/d3fo04204a), 2024-01-01
Supplement: d3fo04204a1.pdf [file d3fo04204a1.pdf]

## 1 Supplementary data

A

| Isoflavones | Yak-kong powder (mg/100g) | FYK (mg/100g) |
|-------------|---------------------------|---------------|
| Genistin    | 49.08                     | -             |
| Daidzin     | 27.83                     | -             |
| Glycitin    | 4.05                      | -             |
| Genistein   | 1.95                      | 10.85         |
| Daidzein    | -                         | 14.45         |
| Glycitein   | 0.72                      | 2.25          |

2

3 **Supplementary table 1.** The change in the content of isoflavone glycosides and aglycones  
4 before and after fermentation. (A) The increased isoflavone aglycone (Genistein, Daidzein,  
5 Glycitein) content after fermentation.

6
